# Supplementary material for: Older trauma patients are at high risk of delirium, especially those with underlying dementia or baseline frailty
Source: HighWire-hosted journal article supplement (doi:10.1136/tsaco-2020-000639), 2021-04-01
Supplement: tsaco-2020-000639supp001_data_supplement.pdf [file tsaco-2020-000639supp001_data_supplement.pdf]

## SUPPLEMENTARY FILE

### **Older trauma patients are at high risk of delirium, especially those with underlying dementia or baseline frailty**

#### **Supplementary Methods**

##### *Definitions of clinical conditions*

Cardiac complications included myocardial infarction, stroke, cardiovascular death, new heart failure or new arrhythmia. Respiratory complications included pneumonia, other chest infection requiring antibiotics, and respiratory failure; pulmonary embolus and deep venous thrombosis fell under the bracket of venous thromboembolism (VTE). Pressure injury included all stages of pressure injury.[Edsberg 2016] As this was a retrospective observational study, complications were identified where recorded in the patient's medical notes.

**Appendix 1: Excerpt from South Western Sydney Local Health District Adult Admission and Transfer of Care Checklist (page 1 of 4-page document)**



**Health**  
South Western Sydney  
Local Health District

|                       |  |                                                               |  |
|-----------------------|--|---------------------------------------------------------------|--|
| SURNAME               |  | MRN                                                           |  |
| OTHER NAMES           |  | <input type="checkbox"/> MALE <input type="checkbox"/> FEMALE |  |
| D.O.B. ____/____/____ |  | M.O.                                                          |  |
| ADDRESS               |  |                                                               |  |
| LOCATION              |  |                                                               |  |

COMPLETE ALL DETAILS OR AFFIX PATIENT LABEL HERE

Admission Date: \_\_\_\_/\_\_\_\_/\_\_\_\_ Time: \_\_\_\_:\_\_\_\_:\_\_\_\_ Interpreter required?  Yes  No Language \_\_\_\_\_  
 Does the patient have an Advanced Care Directive?  Yes  No  Unsure  
 Resuscitation Plan?  Yes  No  Comments: \_\_\_\_\_

**SECTION 1: REQUIRED IN THE FIRST 4 HOURS**

Orientation to Ward  Patient  Relative/Friend  Carer

|                                                                                                                                                                                                                                    |                                                                                                                                                                                            |                                                                                                                                                                                               |
|------------------------------------------------------------------------------------------------------------------------------------------------------------------------------------------------------------------------------------|--------------------------------------------------------------------------------------------------------------------------------------------------------------------------------------------|-----------------------------------------------------------------------------------------------------------------------------------------------------------------------------------------------|
| <input type="checkbox"/> Toilet/Bathroom<br><input type="checkbox"/> Buzzer/Call Bell<br><input type="checkbox"/> Ward/Unit Routine<br>REACH explained <input type="checkbox"/> Yes <input type="checkbox"/> No<br>Comments: _____ | <input type="checkbox"/> TV/Visiting Hours<br><input type="checkbox"/> Meal Times<br>My Passport of Care given <input type="checkbox"/> Yes <input type="checkbox"/> No<br>Comments: _____ | <input type="checkbox"/> Telephone/Mobile/Public Phone<br><input type="checkbox"/> Patient informed of treating doctor<br><input type="checkbox"/> Aware of Rights & Responsibilities/Privacy |
|------------------------------------------------------------------------------------------------------------------------------------------------------------------------------------------------------------------------------------|--------------------------------------------------------------------------------------------------------------------------------------------------------------------------------------------|-----------------------------------------------------------------------------------------------------------------------------------------------------------------------------------------------|

| Admission Checklist                    | Initial | Admission Checklist                                       | Initial |
|----------------------------------------|---------|-----------------------------------------------------------|---------|
| Vital Signs (on appropriate chart)     |         | Check placement of drains/catheters                       |         |
| Pain                                   |         | Correct armband (insitu/allergies)                        |         |
| Blood Glucose Level                    |         | IV line labelled/NA                                       |         |
| Urinalysis                             |         | Suction/oxygen units in working order                     |         |
| Falls Risk Assessment                  |         | FRAMP (if applicable)                                     |         |
| Waterlow Assessment                    |         | Air mattress ordered (if applicable)                      |         |
| Skin integrity checked                 |         | Additional forms in folder (e.g. stoma chart, food chart) |         |
| Height (eMR)                           |         | Medical admission completed                               |         |
| Weight (eMR)                           |         | Medication chart completed                                |         |
| IVC on eMR & dated                     |         | Medication Management Plan completed                      |         |
| Vascular Access Device                 |         | Medications in trolley                                    |         |
| Delirium Risk Screen & Delirium Screen |         | Update handover on eMR                                    |         |
| Confirm Local Medical Officer          |         | Confirm Next of Kin contact details                       |         |

**Medical History**

Presenting Health Problem: \_\_\_\_\_  
 Relevant Coexisting Conditions & Past History: \_\_\_\_\_  
 Are you a carer for someone?  Yes  No Details: \_\_\_\_\_  
 Medication All allergies & adverse reactions must be recorded in the eMR  Yes  No  
 Patient's own medication:  Stored on Ward  S4D/S8 Cupboard  Dose Administration Aid  Herbal/Complimentary  
 Does the patient usually take three or more medications:  Yes  No  
 Have their medications changed in the last week:  Yes  No  
 Is the patient on therapeutic anticoagulation therapy/Novel Oral Anticoagulants (NOACS)  Yes  No  
**If Yes, override on the Falls Risk Assessment, flag patient as high risk and commence FRAMP**

**Valuables**

| Description                             | Ward                     | None                     | Self                     | Family                   | Security                 |
|-----------------------------------------|--------------------------|--------------------------|--------------------------|--------------------------|--------------------------|
| Money (including bank cards)            | <input type="checkbox"/> |
| Glasses                                 | <input type="checkbox"/> |
| Dentures                                | <input type="checkbox"/> |
| Aids: (i.e. walking stick/hearing aids) | <input type="checkbox"/> |
| Watch                                   | <input type="checkbox"/> |
| Rings/other jewellery                   | <input type="checkbox"/> |
| Electronic devices                      | <input type="checkbox"/> |

Completed by: \_\_\_\_\_ Print: \_\_\_\_\_  
 Designation: \_\_\_\_\_ Ward: \_\_\_\_\_ Date: \_\_\_\_/\_\_\_\_/\_\_\_\_

ADULT ADMISSION AND TRANSFER OF CARE ASSESSMENT AND CHECKLIST

AMR 060.001

FILE IN CLINICAL RECORD

Page 1 of 4
